# Supplementary material for: Enhanced photocatalytic CO2 reduction by constructing an In2O3–CuO heterojunction with CuO as a cocatalyst
Source: Royal Society of Chemistry journal article supplement (doi:10.1039/d1cy00318f), 2021-01-01
Supplement: d1cy00318f1.pdf [file d1cy00318f1.pdf]

# Enhanced photocatalytic CO<sub>2</sub> reduction by constructing In<sub>2</sub>O<sub>3</sub>-CuO heterojunction with CuO as cocatalyst

Ke Chen<sup>a</sup>, Xin Zhao<sup>b</sup>, Xiao-Jing Zhang<sup>a</sup>, Weng-Sheng Zhang<sup>a</sup>, Zhi-Fang Wu<sup>a</sup>, Hao-Yu Wang<sup>a,\*</sup>, Dong-Xue Han<sup>a,\*</sup>, Li Niu<sup>a</sup>

<sup>a</sup> school of Chemistry and Chemical Engineering, Guangzhou University, Guangzhou 510006, China.

<sup>b</sup> State Key Laboratory of Electroanalytical Chemistry, C/o Engineering Laboratory for Modern Analytical Techniques, Changchun Institute of Applied Chemistry, Chinese Academy of Sciences, Changchun, 130022, China

E-mail: hywang@gzhu.edu.cn (Haoyu Wang), dxhan@gzhu.edu.cn (Dongxue Han), Tel & Fax: +86-20-39366902.

## 1. Experimental section

### 1.1 Materials

Sodium sulfate (Na<sub>2</sub>SO<sub>4</sub>, >99%) were purchased obtained from Sigma-Aldrich. Sodium sulfite anhydrous (Na<sub>2</sub>SO<sub>3</sub>, >98%), ammonium hydroxide solution (NH<sub>3</sub>·H<sub>2</sub>O, AR, 25-28%) hexamethylenetetramine (C<sub>6</sub>H<sub>12</sub>N<sub>4</sub>, ≥99%) and copper nitrate hydrate (Cu(NO<sub>3</sub>)<sub>3</sub>·3H<sub>2</sub>O, AR) were purchased from Shanghai Macklin Biochemical Co., Ltd. Ethanol (C<sub>2</sub>H<sub>5</sub>OH) was gained from Sinopharm Chemical Reagent Co., Ltd. Sodium citrate tribasic dihydrate (Na<sub>3</sub>C<sub>6</sub>H<sub>5</sub>O<sub>7</sub>·2H<sub>2</sub>O, ≥99%) and indium nitrate hydrate (InCl<sub>3</sub>·4H<sub>2</sub>O, >99.99) was obtained from Beijing Innochem Co., Ltd. All chemicals were used directly as received without further purification.

### 1.2 Experimental procedure

### 1.2.1 Preparation of In<sub>2</sub>O<sub>3</sub> sphere.

In a typical procedure, 0.005 mol InCl<sub>3</sub>·4H<sub>2</sub>O and 0.005 mol Na<sub>3</sub>C<sub>6</sub>H<sub>5</sub>O<sub>7</sub>·2H<sub>2</sub>O was added into a solution of 15 mL H<sub>2</sub>O. After vigorous stirring for 30 min, The pH value of the solution was adjusted to 6.4-6.6 by 0.5 mol/L NH<sub>3</sub>·H<sub>2</sub>O. The mixture was transferred into a 25-mL Teflon-lined autoclave, sealed and heated at 130 °C for 24 h. The system was allowed to cool down to room temperature naturally, and the final product was collected by centrifuging the mixture, washed with H<sub>2</sub>O and ethanol for three times, and then dried at 65 °C for 6 h. The product was further annealed at 500 °C in air for 3 h and cool down to room temperature naturally.

### 1.2.2 Preparation of CuO flowers.

In a typical procedure, 0.05 mol C<sub>6</sub>H<sub>12</sub>N<sub>4</sub> was added into a solution of 50 mL H<sub>2</sub>O (Solution A) and 0.0025 mol Cu(NO<sub>3</sub>)<sub>3</sub>·3H<sub>2</sub>O was added into a solution of 50 mL H<sub>2</sub>O (Solution B). After vigorous stirring for 30 min, add solution A drop by drop to solution B. Then, the mixed solution was heated at 70 °C for 3 hours. The system was allowed to cool down to room temperature naturally, and the final product was collected by centrifuging the mixture, washed with H<sub>2</sub>O and ethanol for three times, and then dried at 65 °C for 6 h.

### 1.2.3 Preparation of CuO flowers/In<sub>2</sub>O<sub>3</sub> sphere Heterostructures.

In a typical procedure, 0.05 mol C<sub>6</sub>H<sub>12</sub>N<sub>4</sub> was added into a solution of 50 ml H<sub>2</sub>O (Solution A) and 0.0015 mol In<sub>2</sub>O<sub>3</sub>-sphere 0.0025 mol Cu(NO<sub>3</sub>)<sub>3</sub>·3H<sub>2</sub>O was added into a solution of 50 ml H<sub>2</sub>O (Solution B). After vigorous stirring for 30 min, add

solution A drop by drop to solution B. Then, the mixed solution was heated at 70°C for 3 hours. The system was allowed to cool down to room temperature naturally, and the final product was collected by centrifuging the mixture, washed with H<sub>2</sub>O and ethanol for three times, and then dried at 65°C for 6 h. The other In<sub>2</sub>O<sub>3</sub>-CuO sample was synthesized in the same way by different input of In<sub>2</sub>O<sub>3</sub>-sphere (0.0045mol In<sub>2</sub>O<sub>3</sub> (IC-2-1); 0.0035mol In<sub>2</sub>O<sub>3</sub> (IC-3-2); 0.0025mol In<sub>2</sub>O<sub>3</sub> (IC-1-1); 0.0015mol In<sub>2</sub>O<sub>3</sub> (IC-2-3); 0.0005mol In<sub>2</sub>O<sub>3</sub> (IC-1-2)).

### **1.3 Material characterization**

The morphology and structure of the samples were characterized by field emission scanning electron microscopy (FE-SEM, JSM-7001F, Japan) and transmission electron microscopy (TEM; jeol, JEM-2010). The crystalline phases of the samples were determined by X-ray diffraction (XRD, PANalytical X'Pert Powder, Netherlands) at room temperature. The X-ray diffraction pattern was described in the scanning range of 10°-80° with the scanning rate of 10° min<sup>-1</sup>. The elemental states of samples were analyzed by X-ray photoelectron spectroscopy (VG ESCALABMK II).

The Ultraviolet-visible (UV-vis) diffuse reflectance spectra (UV-vis DRS) were obtained on a UV-vis spectrophotometer (HITACHI, U-3900) with pure BaSO<sub>4</sub> as a reflectance standard. Brunauer-Emmett-Teller (BET) surface area and CO<sub>2</sub> adsorption tests was measured by nitrogen adsorption and desorption isotherms with a Quantachrome ASiQwin-Autosorb Station 1.. Photoluminescence (PL) spectra were acquired on a fluorescence spectrophotometer (Hitachi, F-4600) with a xenon lamp as

an excitation source (excitation wavelength: 300 nm).

#### 1.4 Photocatalytic CO<sub>2</sub> reduction Measurement

As shown in Figure S1, the equipment for photocatalytic CO<sub>2</sub> reduction reaction is a closed vacuum glass reaction system, which is composed of reaction chamber, constant temperature condensate cooling reaction system and circulating pump.

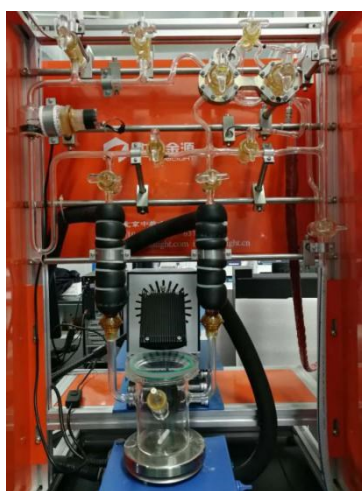

**Figure S1.** Schematic diagram of the photocatalytic reduction CO<sub>2</sub> system.

Typically, 30 mg of photocatalyst, 20mL of 0.01 mol·L<sup>-1</sup> Na<sub>2</sub>SO<sub>3</sub> were added into a gas-closed glass reactor (400 mL in capacity). Then, high purity CO<sub>2</sub> was introduced into the reactor with a partial pressure of 0.4 atm. A 300W Xe lamp was used as the light source and the wavelength of the lamp source is 200-780 nm in the reaction process. During the photocatalytic process, the reaction system was vigorously stirred by a magnetic stirrer. After each reaction, the generated products were quantified by GC (GC2019, 7920-TF2A, China). Other reaction conditions were the same as those of the typical reaction.

#### 1.5 Photoelectrochemical characterizations

### 1.5.1 Transient photocurrent

The transient photocurrent experiment was carried out using a domestic three electrode system in light (3w, perfectlight LS sxe300 +, China) at electrochemical workstation (CHI 760E, Chenhua Instrument, China)

### 1.5.2 Electrochemical impedance spectroscopy (EIS)

The Nyquist plots were measured on a frequency response analyzer (gamery interface 5000, UK). The working electrode was CuO / In<sub>2</sub>O<sub>3</sub> (similar to In<sub>2</sub>O<sub>3</sub>), the counter electrode was platinum mesh, and the reference electrode was Ag / AgCl (3M KCl). Na<sub>2</sub>SO<sub>4</sub> (0.1 M, pH = 7) was used as electrolyte.

### 1.5.3 Mott–Schottky experiment

A Mott–Schottky experiment was in progress in 0.1 M Na<sub>2</sub>SO<sub>4</sub> with the potential window ranged from - 0.5 to + 0.5 eV, using 1000 Hz and an AC amplitude of 10 mV at each of the potentials.

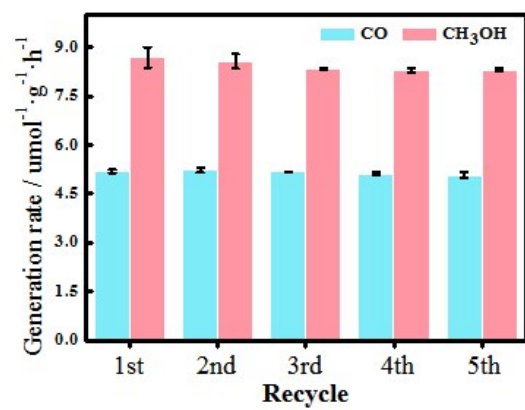

**Figure S2.** CO<sub>2</sub> photoreduction activities of different proportions of In<sub>2</sub>O<sub>3</sub>-CuO.

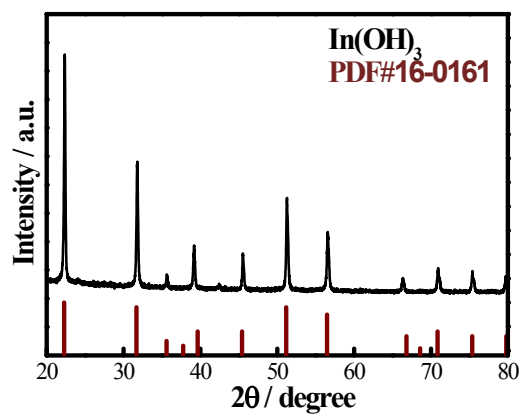

**Figure S3.** XRD pattern of  $\text{In(OH)}_3$ .

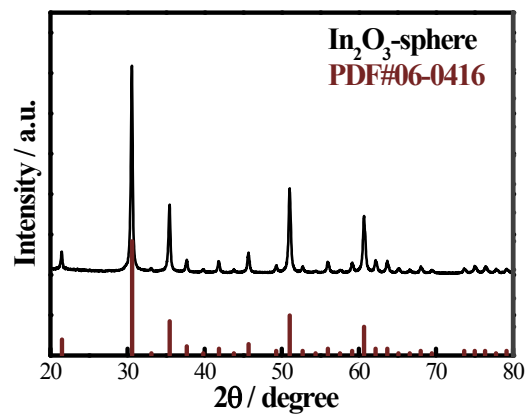

Figure S4. XRD pattern of In<sub>2</sub>O<sub>3</sub> sphere.



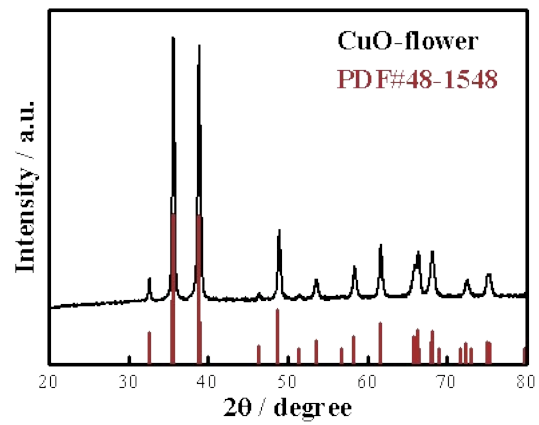

Figure S5. XRD pattern of CuO flower.

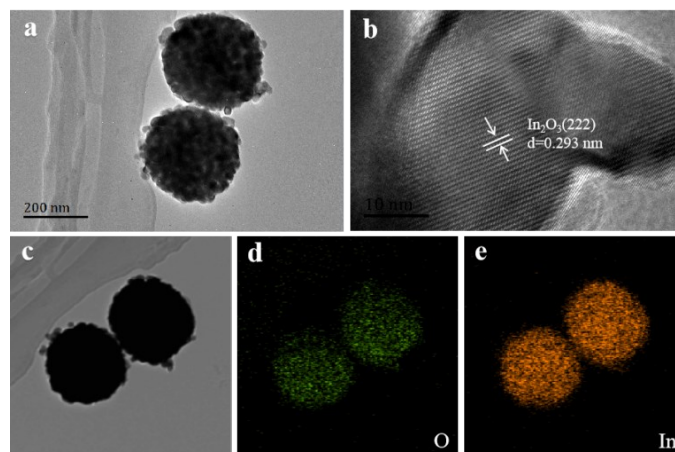

**Figure S6.** (a) TEM images, (b-c) HRTEM image (d-e) EDX mappings of  $\text{In}_2\text{O}_3$  sphere.

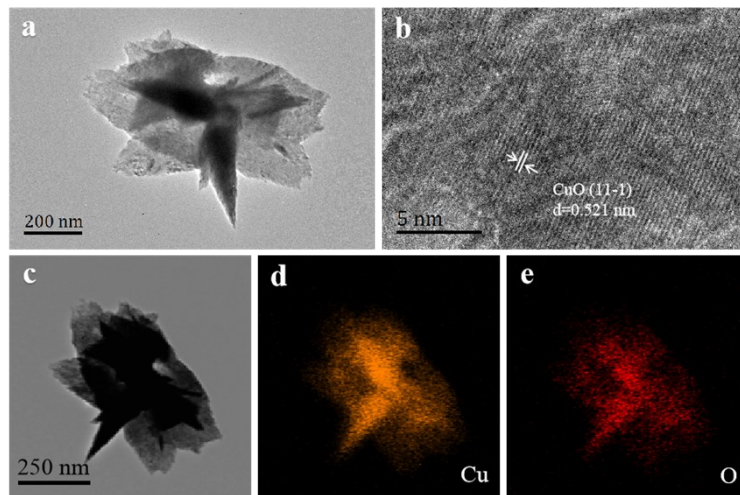

**Figure S7.** (a) TEM images, (b-c) HRTEM image (d-e) EDX mappings of CuO flower

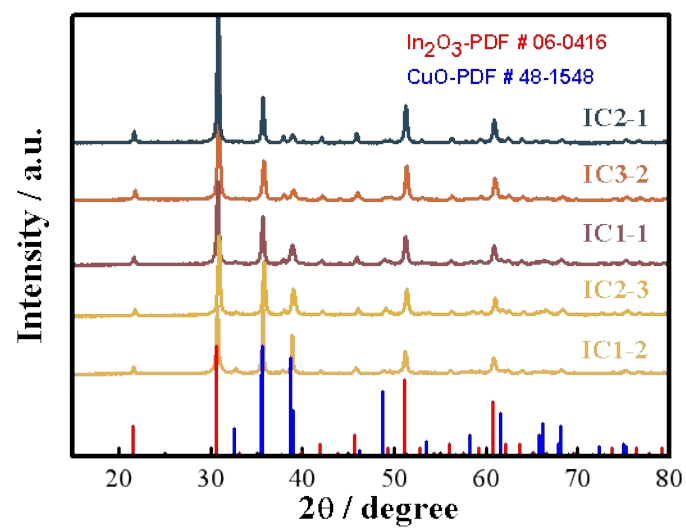

**Figure S8.** XRD pattern of different proportions of In<sub>2</sub>O<sub>3</sub>-CuO.

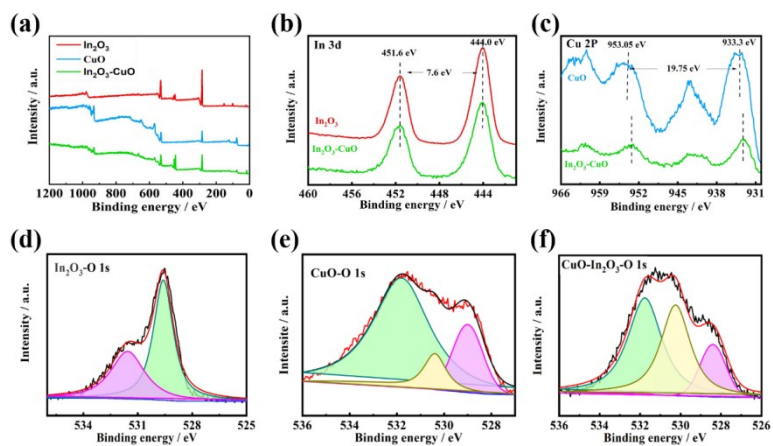

**Figure S9.** XPS spectra of (a) survey, (b) In 3d, (c) Cu 2p and O 1s of different samples.

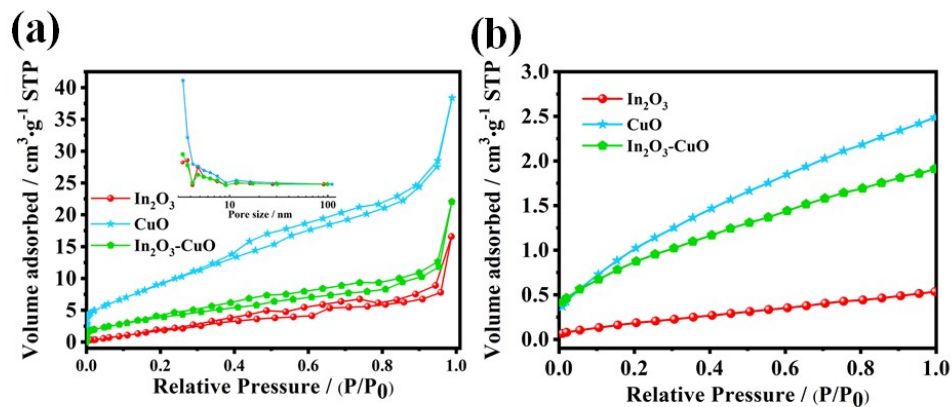

**Figure S10.** (a) N<sub>2</sub> adsorption-desorption isotherms, pore size distributions (inset) and (b) CO<sub>2</sub> adsorption curves of In<sub>2</sub>O<sub>3</sub>, CuO and In<sub>2</sub>O<sub>3</sub>-CuO.

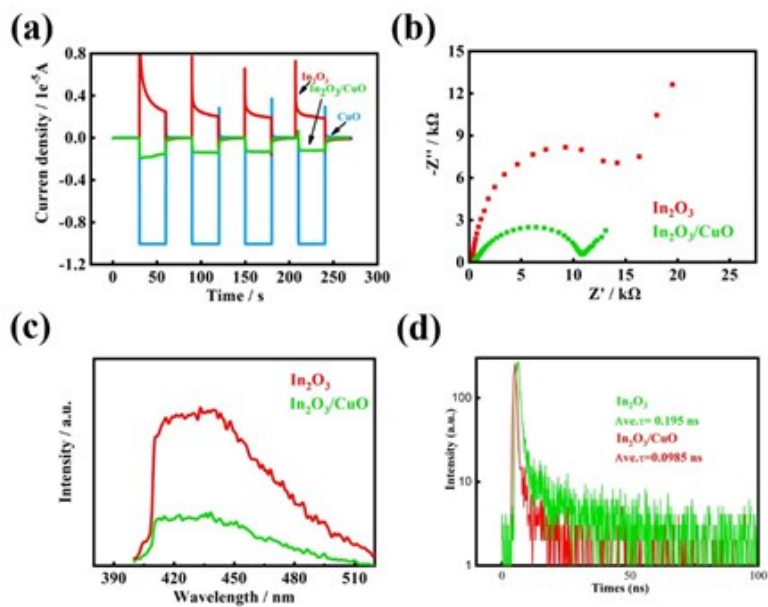

**Fig. S11.** (a) Transient photocurrent spectra, (b) EIS spectra of  $\text{In}_2\text{O}_3$  and  $\text{In}_2\text{O}_3/\text{CuO}$ , and (c) steady-state PL spectra (d) Time-resolved transient PL decay of  $\text{In}_2\text{O}_3$ ,  $\text{CuO}$  and  $\text{In}_2\text{O}_3/\text{CuO}$ .

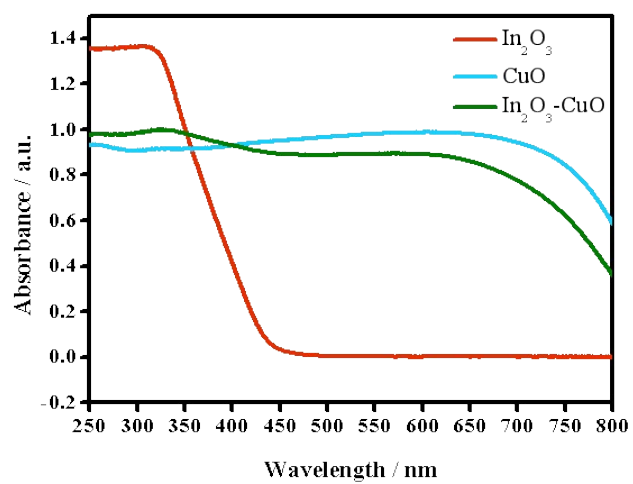

**Figure S12.** DRS of In<sub>2</sub>O<sub>3</sub>, CuO and In<sub>2</sub>O<sub>3</sub>-CuO.



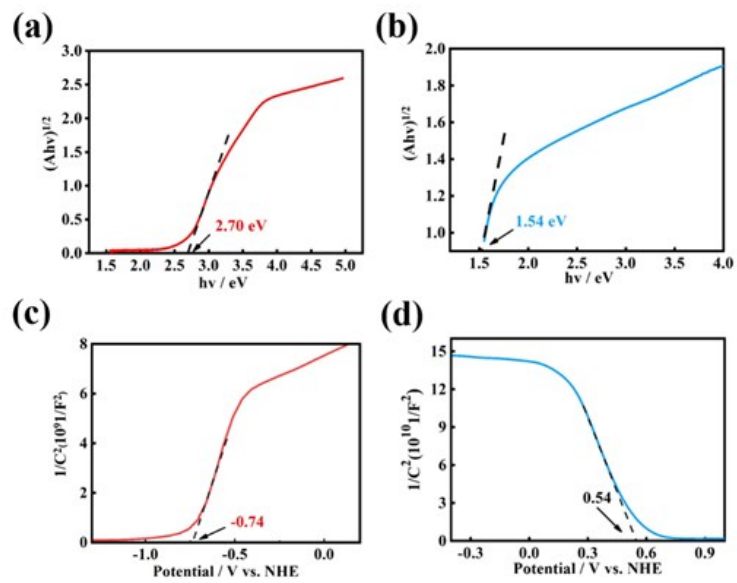

**Figure S13.** Tauc plots of (a)  $\text{In}_2\text{O}_3$ , (b)  $\text{CuO}$  and Mott-Schottky plots of (a)  $\text{In}_2\text{O}_3$ , (b)  $\text{CuO}$ .

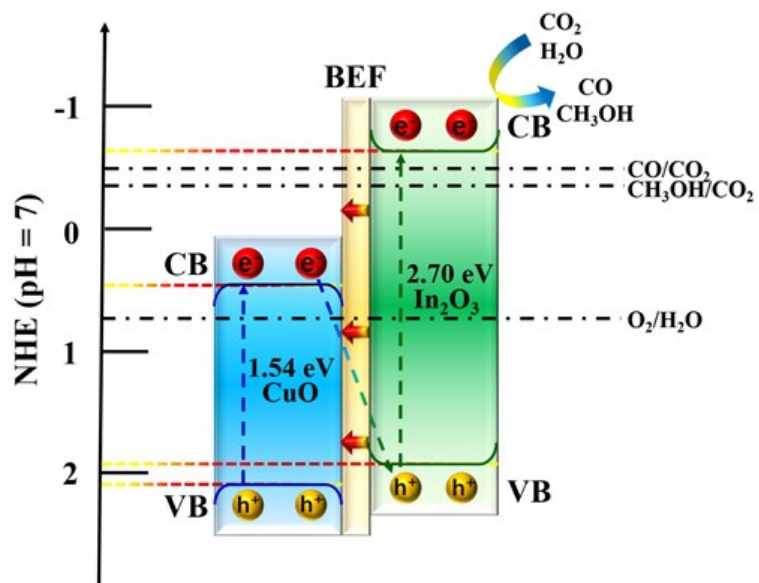

**Figure S14.** Z-scheme model of  $\text{In}_2\text{O}_3$ - $\text{CuO}$  photocatalyst and its charge transfer process under light irradiation.
